# Supplementary material for: A Simulation-Data-Based Machine Learning Model for Predicting Basic Parameter Settings of the Plasticizing Process in Injection Molding
Source: MDPI journal article supplement (doi:10.3390/polym13162652), 2021-08-10
Supplement: s1 [file s1]

# Supplementary File

This file gives an overview of all the machine learning methods used in the paper. It shows all hyperparameters of the corresponding best model that was found.

All methods were implemented with Python's library "sklearn".

## Gaussian Process Regression:

**Method explanation:** [1.7. Gaussian Processes — scikit-learn 0.24.2 documentation](#)

**best model hyperparameters:**

```
alpha=1e-05,  
copy_X_train=True,  
kernel=None,  
n_restarts_optimizer=9,  
normalize_y=False,  
optimizer='fmin_l_bfgs_b',  
random_state=None
```

## Support Vector Regression:

**Method explanation:** [sklearn.svm.SVR — scikit-learn 0.24.2 documentation](#)

**best model hyperparameters:**

```
C=700,  
cache_size=200,  
coef0=0.0,  
degree=3,  
epsilon=0.1,  
gamma='scale',  
kernel='rbf',  
max_iter=-1,  
shrinking=True,  
tol=0.001,  
verbose=False
```

## Polynomial Regression:

**Method explanation:** [sklearn.preprocessing.PolynomialFeatures — scikit-learn 0.24.2 documentation](#)

**best model hyperparameters:**

```
Pipeline(memory=None,  
          steps=[('polynomial_features',  
                  PolynomialFeatures(degree=6, include_bias=False,  
                                     interaction_only=False, order='C')),  
                  ('linear_regression',  
                  LinearRegression(copy_X=True, fit_intercept=True, n_jobs=None,  
                                   normalize=False))],  
          verbose=False)
```

## Random Forest:

**Method explanation:** [sklearn.ensemble.RandomForestRegressor — scikit-learn 0.24.2 documentation](#)

**best model hyperparameters:**

```
bootstrap=True,  
ccp_alpha=0.0,  
criterion='mse',  
max_depth=None,  
max_features='auto',  
max_leaf_nodes=None,  
max_samples=None,  
min_impurity_decrease=0.0,  
min_impurity_split=None,  
min_samples_leaf=1,  
min_samples_split=2,  
min_weight_fraction_leaf=0.0,  
n_estimators=125,  
n_jobs=None,  
oob_score=False,  
random_state=12,
```

```
verbose=0,  
warm_start=False)
```

## Gradient Boosting:

**Method explanation:** [sklearn.ensemble.GradientBoostingRegressor — scikit-learn 0.24.2 documentation](#)

**best model hyperparameters:**

```
alpha=0.9,  
ccp_alpha=0.0,  
criterion='friedman_mse',  
init=None,  
learning_rate=0.1,  
loss='ls',  
max_depth=3,  
max_features=None,  
max_leaf_nodes=None,  
min_impurity_decrease=0.0,  
min_impurity_split=None,  
min_samples_leaf=1,  
min_samples_split=2,  
min_weight_fraction_leaf=0.0,  
n_estimators=75,  
n_iter_no_change=None,  
presort='deprecated',  
random_state=None,  
subsample=1.0,  
tol=0.0001,  
validation_fraction=0.1,  
verbose=0, warm_start=False)
```
